# Supplementary material for: Assessing the impact of CO 2 -equilibrated ocean alkalinity enhancement on microbial metabolic rates in an oligotrophic system
Source: Copernicus journal article supplement (doi:10.5194/bg-21-2859-2024), 2024-06-13
Supplement: Supplementary file 1 [file bg-21-2859-2024-supplement.pdf]

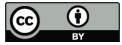

*Supplement of*

## **Assessing the impact of CO<sub>2</sub>-equilibrated ocean alkalinity enhancement on microbial metabolic rates in an oligotrophic system**

**Laura Marín-Samper et al.**

*Correspondence to:* Laura Marín-Samper ([laura.marin@ulpgc.es](mailto:laura.marin@ulpgc.es)) and Javier Arístegui ([javier.aristegui@ulpgc.es](mailto:javier.aristegui@ulpgc.es))

The copyright of individual parts of the supplement might differ from the article licence.

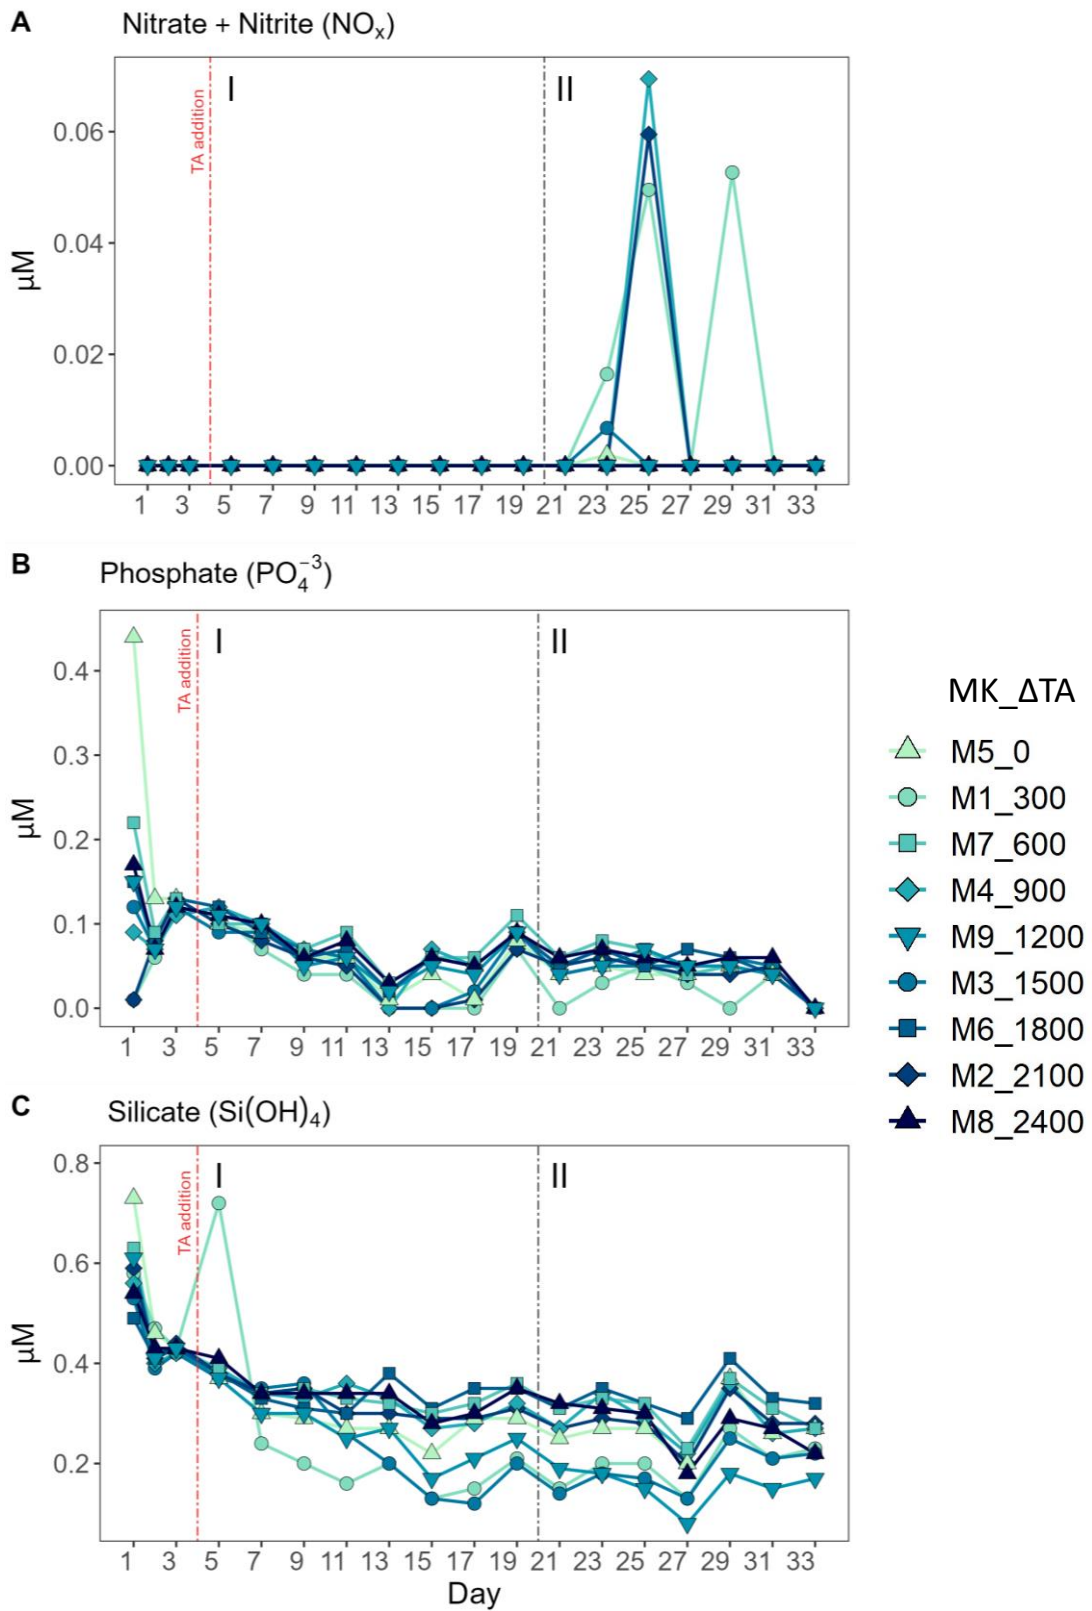

**Figure S1.** Temporal development of the A) nitrate+nitrite, B) phosphate and C) silica in situ concentrations.

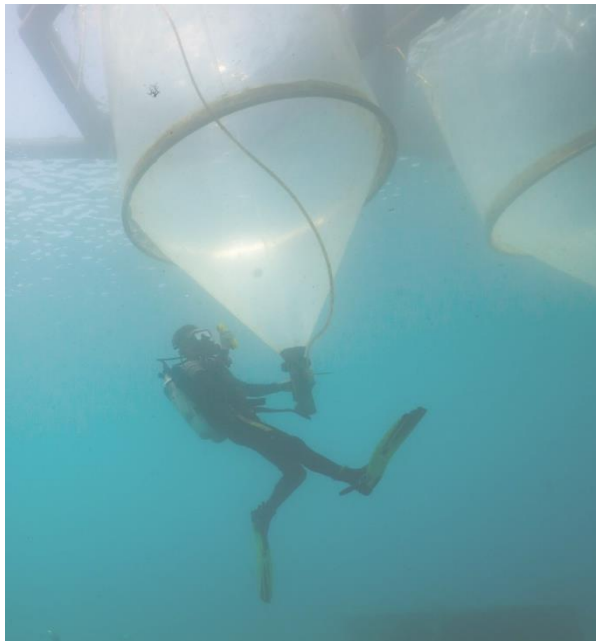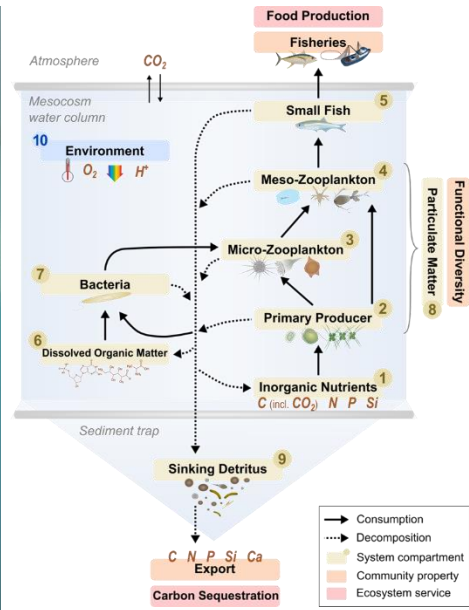

Figure S2. Picture and diagram of the mesocosms used in the current experiment. Left photography by Dr. Michael Swatt and right diagram by Dr. Silvan Goldenberg.

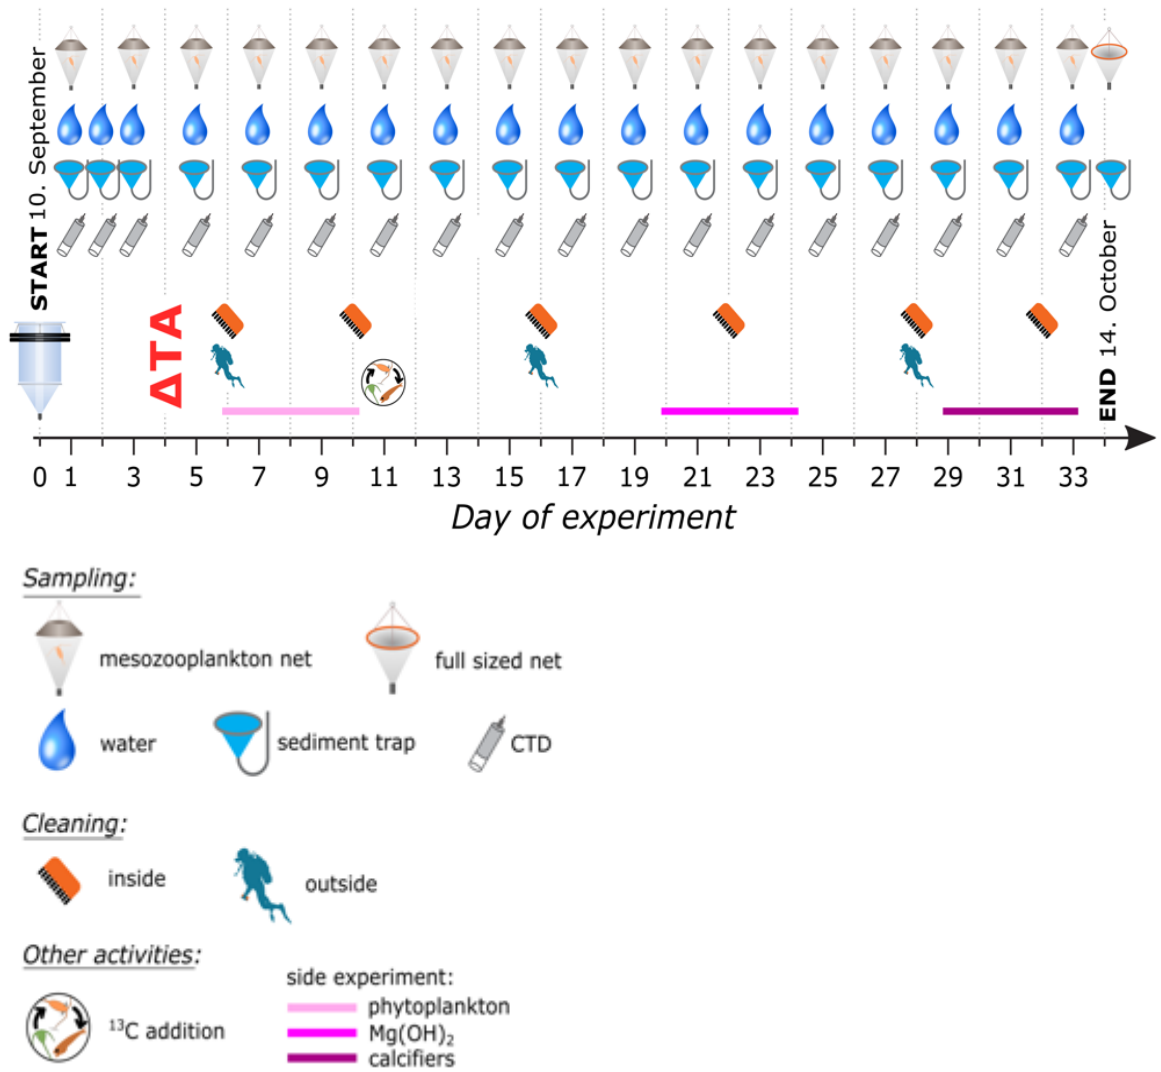

**Figure S3.** Activities conducted throughout the experimental period including, mesozooplankton and full-sized net casts, “water” meaning sampling for all parameters into the canisters or other parameter specific bottles, CTD casts, inside and outside cleaning of the mesocosm bags,  $^{13}\text{C}$  spiking and side experiments. Figure proportioned by Dr. Silvan Goldenberg.

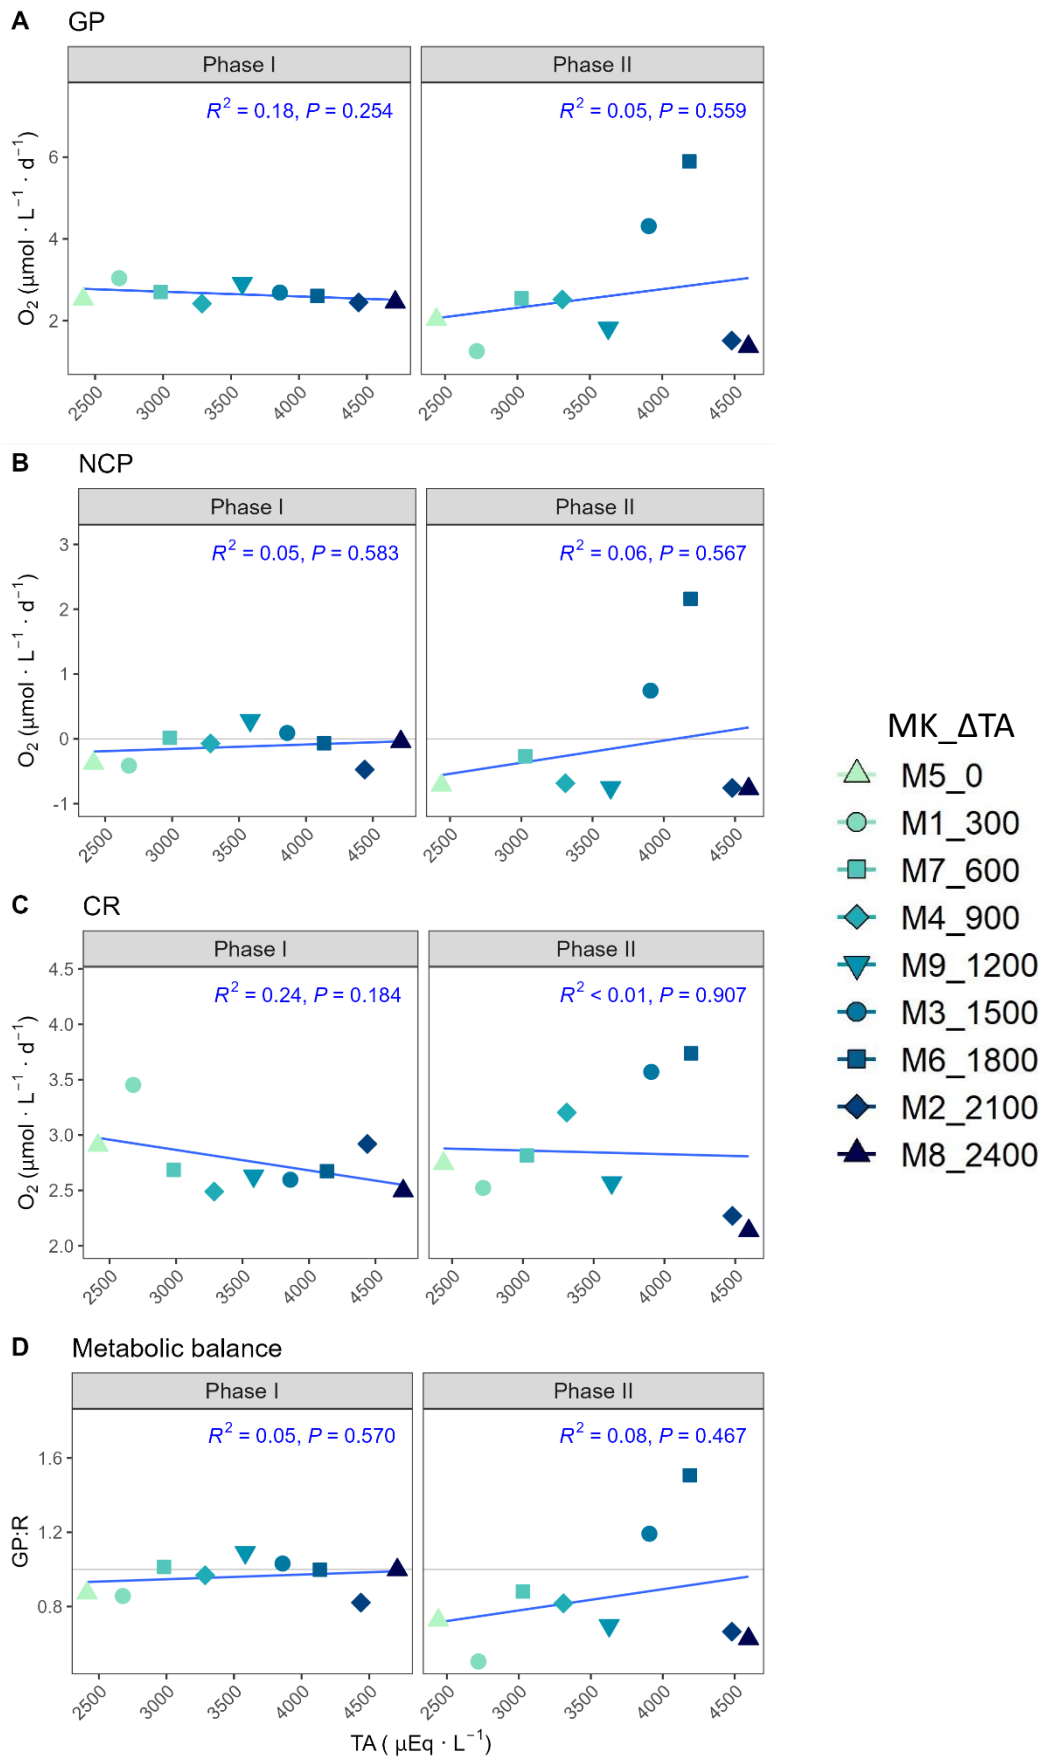

**Figure S4. Phase-averaged linear regressions of A) Gross Production (GP), B) Net Community Production (NCP), C) Community Respiration (CR) and D) metabolic balance (GP:CR).**

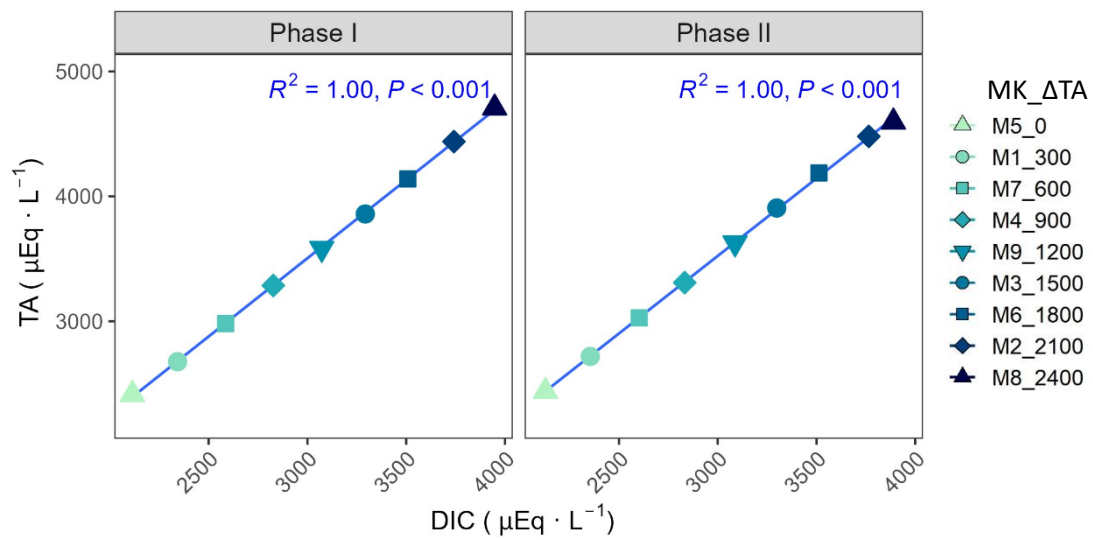

**Figure S5. Linear regression between the post treatment averaged-out values for TA and DIC, obtained for each phase.**
